# Supplementary material for: Assessment of Controlled Substance Distribution to U.S. Veterinary Teaching Institutions From 2006 to 2019
Source: Front Vet Sci. 2020 Dec 18;7:615646. doi: 10.3389/fvets.2020.615646 (PMC7775551; doi:10.3389/fvets.2020.615646)
Supplement: Supplementary file 1 [file Data_Sheet_1.xlsx]

## Sheet: Grams_1
Name_06	Grams_06	Grams_07	Grams_08	Grams_09	Grams_10	Grams_11	Grams_12	Grams_13	Grams_14	Grams_15	Grams_16	Grams_17	Grams_18	Grams_19
AMPHETAMINE	2134.04	251.03	730.51	262.5	288.64	268.12	218.13	121.33	1.91	8.81	0.73	2.2	0.73	1.25
D-METHAMPHETAMINE	16.04	4.01	5.42	8.11	40.49	5.42	0.08	16.15	2.05	4.02	4.18	8.03
LISDEXAMFETAMINE		5.78	90.18	46.83	115.62	125.45	127.18	60.12
METHYLPHENIDATE	789.51	93.58	420.84	131.35	146.39	185.56	188.59	98.84	0.77	3.46	18.33	0.43		2.68
BUTALBITAL	30	5	35
PENTOBARBITAL (SCHEDULE 2)	18884.3	35079.1	37791.5	39640.4	69350.4	41856.5	36380.3	51386.6	2030.22	55372.1	42051.1	48702.7
PHENCYCLIDINE (PCP)		2.46	1.17	0.91	0.91	0.22	0.04	0.87		0.22
COCAINE	15.16	7.13	1.79	15.18	14.39	0.89	11.61	12.18	3.27	1.46	1.18	3.11
CODEINE	427.15	84.61	182.14	148.08	237.84	333.07	279.98	219.21	53.86	552.72	1343.24	2220.08	2144.83	1263.26
BUPRENORPHINE	7.16	6.16	11.22	11.13	9.04	10.1	20.01	16.06	0.15	7.54	6.68	8	7.9	7.11
DIHYDROCODEINE	0.32		1.07
OXYCODONE	233.81	8.62	88.75	9.41	12.55	8.25	4.48	2.69			1.34	0.45	0.45	0.45
HYDROMORPHONE	42.09	52.37	48.88	37.62	39.23	43.98	56.84	51.58	2.01	41.15	47.39	50.89	30.45	37.02
HYDROCODONE	391.22	141.47	343.91	309.9	545.35	164.16	111.36	98.15	9.17	106.61	92.98	123.82	116.31	118.73
MEPERIDINE (PETHIDINE)	57.01	34.34	45.54	53.16	17.87	26.15	35.95	19.61	2.45	21.79	15.25	3.81	7.63	10.89
METHADONE	8.84	85.18	31.39	56.7	72.89	100.71	113.23	106.43	21.56	140.33	150.17	128.35	135.86	157.15
MORPHINE	170.74	181.14	231.48	148.98	156	176.49	187.62	139.63	7.2	144.68	149.12	133.82	212.5	133
THEBAINE	100
NALOXONE	0.48
OXYMORPHONE	0.17	0.75	0.89	1.98	1.84	2.03	2.36	3.01	0.58	1.86	1.86	0.54
ALFENTANIL					0.01			0.04	0.01	0.01
REMIFENTANIL		0.09	0.38	0.27	0.17	0.2	0.26	0.24	0.05	0.32	0.23	0.25
SUFENTANIL BASE			0	0.05	0.1				0.03		0	0.02
Tapentadol					20	35	30	13
FENTANYL BASE		19.61	18.23	14.89	24.6	19.34	16.39	27.75	0.64	18.88	16.36	15.81	13.17	14.01
										total	43900.1
										pento	42051.1
										total-pento	1849.04
										Ratio	22.7421

## Sheet: Grams_2
year	amphetamine (06)	methamphetamine (10)	lisdexamfetamine (11)	methylphenidate (06)	cocaine (14)	butalbital (06)	pentobarbital (06)	pencyclidine (07)			CODEINE	BUPRENORPHINE	DIHYDROCODEINE	OXYCODONE	HYDROMORPHONE	HYDROCODONE	MEPERIDINE (PETHIDINE)	METHADONE	MORPHINE	THEBAINE	NALOXONE	OXYMORPHONE	ALFENTANIL	REMIFENTANIL	SUFENTANIL BASE	Tapentadol	FENTANYL BASE
6	2134.04	16.04		789.51	15.16	30	18884.3				427.15	7.16	0.32	233.81	42.09	391.22	57.01	8.84	170.74	100	0.48	0.17					15.43
7	251.03	4.01	5.78	93.58	7.13	5	35079.1	2.46			84.61	6.16		8.62	52.37	141.47	34.34	85.18	181.14			0.75		0.09			19.61
8	730.51	5.42	90.18	420.84	1.79	35	37791.5	1.17			182.14	11.22	1.07	88.75	48.88	343.91	45.54	31.39	231.48			0.89		0.38	0		18.23
9	262.5	8.11	46.83	131.35	15.18		39640.4	0.91			148.08	11.13		9.41	37.62	309.9	53.16	56.7	148.98			1.98		0.27	0.05		14.89
10	288.64	40.49	115.62	146.39	14.39		69350.4	0.91			237.84	9.04		12.55	39.23	545.35	17.87	72.89	156			1.84	0.01	0.17	0.1	20	24.6
11	268.12	5.42	125.45	185.56	0.89		41856.5	0.22			333.07	10.1		8.25	43.98	164.16	26.15	100.71	176.49			2.03		0.2		35	19.34
12	218.13	0.08	127.18	188.59	11.61		36380.3	0.04			279.98	20.01		4.48	56.84	111.36	35.95	113.23	187.62			2.36		0.26		30	16.39
13	121.33	16.15	60.12	98.84	12.18		51386.6	0.87			219.21	16.06		2.69	51.58	98.15	19.61	106.43	139.63			3.01	0.04	0.24		13	27.75
14	9.54	4.1		3.86	16.36		48725.3				323.17	10.61			46.34	91.7	9.8	150.89	165.71			2.32	0.01	0.23	0.03		17.85
15	8.81	4.02		3.46	1.46		55372.1	0.22			552.72	7.54			41.15	106.61	21.79	140.33	144.68			1.86	0.01	0.32			18.88
16	0.73	4.18		18.33	1.18		42051.1				1343.24	6.68		1.34	47.39	92.98	15.25	150.17	149.12			1.86		0.23	0		16.36
17	2.2	8.03		0.43	3.11		48702.7				2220.08	8		0.45	50.89	123.82	3.81	128.35	133.82			0.54		0.25	0.02		15.81
18	0.73										2144.83	7.9		0.45	30.45	116.31	7.63	135.86	212.5								13.17
19	1.25			2.68							1263.26	7.11		0.45	37.02	118.73	10.89	157.15	133								14.01
											reduction
											0.430984						0.191019		0.778962			42.3284					0.907971
																						35.3774
																	increase	17.7771				77.7058

## Sheet: Buyers
Name_06	Buyers_06	Grams_06	Name_07	Buyer_07	Grams_07	Name_08	Buyers_08	Grams_08	Name_09	Buyers_09	Grams_09	Name_10	Buyers_10	Grams_10	Name_11	Buyers_11	Grams_11	Name_12$	Buyers_12	Grams_12	Name_13$	Buyers_13	Grams_13	Names_14$	Buyers_14	Grams_14	Names_15$	Buyers_15	Grams_15	Name_16$	Buyers_16	Grams_16	Name_17$	Buyers_17	Grams_17	Name_18$	Buyers_18	Grams_18	Name_19$	Buyers_19	Grams_19
AMPHETAMINE	10	2134.04	AMPHETAMINE	3	251.03	AMPHETAMINE	4	730.51	AMPHETAMINE	6	262.5	AMPHETAMINE	5	288.64	AMPHETAMINE	2	268.12	AMPHETAMINE	3	218.13	AMPHETAMINE	7	121.33	AMPHETAMINE	9.54	1.91	AMPHETAMINE	4	8.81	AMPHETAMINE	1	0.73	AMPHETAMINE	2	2.2	AMPHETAMINE	1	0.73	AMPHETAMINE	1	1.25
D-METHAMPHETAMINE	4	16.04	D-METHAMPHETAMINE	1	4.01	D-METHAMPHETAMINE	3	5.42	D-METHAMPHETAMINE	3	8.11	D-METHAMPHETAMINE	6	40.49	D-METHAMPHETAMINE	5	5.42	D-METHAMPHETAMINE	1	0.08	D-METHAMPHETAMINE	4	16.15	D-METHAMPHETAMINE	4.1	2.05	D-METHAMPHETAMINE	1	4.02	D-METHAMPHETAMINE	3	4.18	D-METHAMPHETAMINE	2	8.03	D-METHAMPHETAMINE			D-METHAMPHETAMINE
LISDEXAMFETAMINE			LISDEXAMFETAMINE	1	5.78	LISDEXAMFETAMINE	2	90.18	LISDEXAMFETAMINE	1	46.83	LISDEXAMFETAMINE	1	115.62	LISDEXAMFETAMINE	1	125.45	LISDEXAMFETAMINE	1	127.18	LISDEXAMFETAMINE	1	60.12	LISDEXAMFETAMINE			LISDEXAMFETAMINE			LISDEXAMFETAMINE			LISDEXAMFETAMINE			LISDEXAMFETAMINE			LISDEXAMFETAMINE
MEPHEDRONE; 4-METHOXYMETHCATHINONE;METHEDRONE			MEPHEDRONE; 4-METHOXYMETHCATHINONE;METHEDRONE			MEPHEDRONE; 4-METHOXYMETHCATHINONE;METHEDRONE			MEPHEDRONE; 4-METHOXYMETHCATHINONE;METHEDRONE			MEPHEDRONE; 4-METHOXYMETHCATHINONE;METHEDRONE			MEPHEDRONE; 4-METHOXYMETHCATHINONE;METHEDRONE			MEPHEDRONE; 4-METHOXYMETHCATHINONE;METHEDRONE	1	0.02	MEPHEDRONE; 4-METHOXYMETHCATHINONE;METHEDRONE			MEPHEDRONE; 4-METHOXYMETHCATHINONE;METHEDRONE			MEPHEDRONE; 4-METHOXYMETHCATHINONE;METHEDRONE			MEPHEDRONE; 4-METHOXYMETHCATHINONE;METHEDRONE			MEPHEDRONE; 4-METHOXYMETHCATHINONE;METHEDRONE			MEPHEDRONE; 4-METHOXYMETHCATHINONE;METHEDRONE			MEPHEDRONE; 4-METHOXYMETHCATHINONE;METHEDRONE
METHYLPHENIDATE	5	789.51	METHYLPHENIDATE	2	93.58	METHYLPHENIDATE	4	420.84	METHYLPHENIDATE	3	131.35	METHYLPHENIDATE	4	146.39	METHYLPHENIDATE (DL;D;L;ISOMERS)	1	185.56	METHYLPHENIDATE	3	188.59	METHYLPHENIDATE (DL;D;L;ISOMERS)	3	98.84	METHYLPHENIDATE (DL;D;L;ISOMERS)	3.86	0.77	METHYLPHENIDATE (DL;D;L;ISOMERS)	3	3.46	METHYLPHENIDATE (DL;D;L;ISOMERS)	5	18.33	METHYLPHENIDATE (DL;D;L;ISOMERS)	1	0.43	METHYLPHENIDATE (DL;D;L;ISOMERS)			METHYLPHENIDATE (DL;D;L;ISOMERS)	2	2.68
GAMMA HYDROXYBUTYRIC ACID			GAMMA HYDROXYBUTYRIC ACID			GAMMA HYDROXYBUTYRIC ACID	1	8.26	GAMMA HYDROXYBUTYRIC ACID			GAMMA HYDROXYBUTYRIC ACID			GAMMA HYDROXYBUTYRIC ACID			GAMMA HYDROXYBUTYRIC ACID			GAMMA HYDROXYBUTYRIC ACID			GAMMA HYDROXYBUTYRIC ACID			GAMMA HYDROXYBUTYRIC ACID			GAMMA HYDROXYBUTYRIC ACID			GAMMA HYDROXYBUTYRIC ACID			GAMMA HYDROXYBUTYRIC ACID			GAMMA HYDROXYBUTYRIC ACID
AMOBARBITAL (SCHEDULE 2)	1	0.09	AMOBARBITAL (SCHEDULE 2)	1	0.18	AMOBARBITAL (SCHEDULE 2)			AMOBARBITAL (SCHEDULE 2)			AMOBARBITAL (SCHEDULE 2)			AMOBARBITAL (SCHEDULE 2)			AMOBARBITAL (SCHEDULE 2)			AMOBARBITAL (SCHEDULE 2)			AMOBARBITAL (SCHEDULE 2)			AMOBARBITAL (SCHEDULE 2)			AMOBARBITAL (SCHEDULE 2)			AMOBARBITAL (SCHEDULE 2)			AMOBARBITAL (SCHEDULE 2)			AMOBARBITAL (SCHEDULE 2)
BUTALBITAL	2	30	BUTALBITAL	1	5	BUTALBITAL	1	35	BUTALBITAL			BUTALBITAL			BUTALBITAL			BUTALBITAL			BUTALBITAL			BUTALBITAL			BUTALBITAL			BUTALBITAL			BUTALBITAL			BUTALBITAL			BUTALBITAL
PENTOBARBITAL (SCHEDULE 2)	34	18884.3	PENTOBARBITAL (SCHEDULE 2)	44	35079.1	PENTOBARBITAL (SCHEDULE 2)	43	37791.5	PENTOBARBITAL (SCHEDULE 2)	34	39640.4	PENTOBARBITAL (SCHEDULE 2)	31	69350.4	PENTOBARBITAL (SCHEDULE 2)	21	41856.5	PENTOBARBITAL (SCHEDULE 2)	28	36380.3	PENTOBARBITAL (SCHEDULE 2)	28	51386.6	PENTOBARBITAL (SCHEDULE 2)	48725.3	2030.22	PENTOBARBITAL (SCHEDULE 2)	19	55372.1	PENTOBARBITAL (SCHEDULE 2)	17	42051.1	PENTOBARBITAL (SCHEDULE 2)	20	48702.7	PENTOBARBITAL (SCHEDULE 2)			PENTOBARBITAL (SCHEDULE 2)
5-METHOXY-N,N-DIISOPROPYLTRYPTAMINE(5-MEO-DIPT)			5-METHOXY-N,N-DIISOPROPYLTRYPTAMINE(5-MEO-DIPT)			5-METHOXY-N,N-DIISOPROPYLTRYPTAMINE(5-MEO-DIPT)			5-METHOXY-N,N-DIISOPROPYLTRYPTAMINE(5-MEO-DIPT)			5-METHOXY-N,N-DIISOPROPYLTRYPTAMINE(5-MEO-DIPT)			5-METHOXY-N,N-DIISOPROPYLTRYPTAMINE(5-MEO-DIPT)			5-METHOXY-N,N-DIISOPROPYLTRYPTAMINE(5-MEO-DIPT)	1	0.01	5-METHOXY-N,N-DIISOPROPYLTRYPTAMINE(5-MEO-DIPT)			5-METHOXY-N,N-DIISOPROPYLTRYPTAMINE(5-MEO-DIPT)			5-METHOXY-N,N-DIISOPROPYLTRYPTAMINE(5-MEO-DIPT)			5-METHOXY-N,N-DIISOPROPYLTRYPTAMINE(5-MEO-DIPT)			5-METHOXY-N,N-DIISOPROPYLTRYPTAMINE(5-MEO-DIPT)			5-METHOXY-N,N-DIISOPROPYLTRYPTAMINE(5-MEO-DIPT)			5-METHOXY-N,N-DIISOPROPYLTRYPTAMINE(5-MEO-DIPT)
PHENCYCLIDINE (PCP)			PHENCYCLIDINE (PCP)	2	2.46	PHENCYCLIDINE (PCP)	2	1.17	PHENCYCLIDINE (PCP)	3	0.91	PHENCYCLIDINE (PCP)	2	0.91	PHENCYCLIDINE (PCP)	1	0.22	PHENCYCLIDINE (PCP)	2	0.04	PHENCYCLIDINE (PCP)	2	0.87	PHENCYCLIDINE (PCP)			PHENCYCLIDINE (PCP)	1	0.22	PHENCYCLIDINE (PCP)			PHENCYCLIDINE (PCP)			PHENCYCLIDINE (PCP)			PHENCYCLIDINE (PCP)
COCAINE	4	15.16	COCAINE	4	7.13	COCAINE	2	1.79	COCAINE	5	15.18	COCAINE	5	14.39	COCAINE	1	0.89	COCAINE	4	11.61	COCAINE	5	12.18	COCAINE	16.36	3.27	COCAINE	2	1.46	COCAINE	2	1.18	COCAINE	3	3.11	COCAINE			COCAINE
CODEINE	8	427.15	CODEINE	6	84.61	CODEINE	7	182.14	CODEINE	5	148.08	CODEINE	9	237.84	CODEINE	7	333.07	CODEINE	9	279.98	CODEINE	9	219.21	CODEINE	323.17	53.86	CODEINE	5	552.72	CODEINE	6	1343.24	CODEINE	5	2220.08	CODEINE	5	2144.83	CODEINE	5	1263.26
BUPRENORPHINE	15	7.16	BUPRENORPHINE	16	6.16	BUPRENORPHINE	63	11.22	BUPRENORPHINE	74	11.13	BUPRENORPHINE	65	9.04	BUPRENORPHINE	86	10.1	BUPRENORPHINE	78	20.01	BUPRENORPHINE	84	16.06	BUPRENORPHINE	10.61	0.15	BUPRENORPHINE	77	7.54	BUPRENORPHINE	64	6.68	BUPRENORPHINE	64	8	BUPRENORPHINE	57	7.9	BUPRENORPHINE	53	7.11
DIHYDROCODEINE	1	0.32	DIHYDROCODEINE			DIHYDROCODEINE	1	1.07	DIHYDROCODEINE			DIHYDROCODEINE			DIHYDROCODEINE			DIHYDROCODEINE			DIHYDROCODEINE			DIHYDROCODEINE			DIHYDROCODEINE			DIHYDROCODEINE			DIHYDROCODEINE			DIHYDROCODEINE			DIHYDROCODEINE
OXYCODONE	4	233.81	OXYCODONE	3	8.62	OXYCODONE	3	88.75	OXYCODONE	1	9.41	OXYCODONE	2	12.55	OXYCODONE	1	8.25	OXYCODONE	2	4.48	OXYCODONE	3	2.69	OXYCODONE			OXYCODONE			OXYCODONE	1	1.34	OXYCODONE	1	0.45	OXYCODONE	1	0.45	OXYCODONE	1	0.45
HYDROMORPHONE	5	42.09	HYDROMORPHONE	9	52.37	HYDROMORPHONE	12	48.88	HYDROMORPHONE	13	37.62	HYDROMORPHONE	13	39.23	HYDROMORPHONE	16	43.98	HYDROMORPHONE	19	56.84	HYDROMORPHONE	22	51.58	HYDROMORPHONE	46.34	2.01	HYDROMORPHONE	25	41.15	HYDROMORPHONE	28	47.39	HYDROMORPHONE	24	50.89	HYDROMORPHONE	20	30.45	HYDROMORPHONE	25	37.02
HYDROCODONE	10	391.22	HYDROCODONE	9	141.47	HYDROCODONE	13	343.91	HYDROCODONE	14	309.9	HYDROCODONE	15	545.35	HYDROCODONE	17	164.16	HYDROCODONE	15	111.36	HYDROCODONE	12	98.15	HYDROCODONE	91.7	9.17	HYDROCODONE	9	106.61	HYDROCODONE	7	92.98	HYDROCODONE	8	123.82	HYDROCODONE	10	116.31	HYDROCODONE	8	118.73
MEPERIDINE (PETHIDINE)	6	57.01	MEPERIDINE (PETHIDINE)	10	34.34	MEPERIDINE (PETHIDINE)	10	45.54	MEPERIDINE (PETHIDINE)	10	53.16	MEPERIDINE (PETHIDINE)	6	17.87	MEPERIDINE (PETHIDINE)	7	26.15	MEPERIDINE (PETHIDINE)	7	35.95	MEPERIDINE (PETHIDINE)	4	19.61	MEPERIDINE (PETHIDINE)	9.8	2.45	MEPERIDINE (PETHIDINE)	8	21.79	MEPERIDINE (PETHIDINE)	3	15.25	MEPERIDINE (PETHIDINE)	3	3.81	MEPERIDINE (PETHIDINE)	3	7.63	MEPERIDINE (PETHIDINE)	3	10.89
METHADONE	4	8.84	METHADONE	4	85.18	METHADONE	3	31.39	METHADONE	2	56.7	METHADONE	5	72.89	METHADONE	4	100.71	METHADONE	4	113.23	METHADONE	5	106.43	METHADONE	150.89	21.56	METHADONE	8	140.33	METHADONE	6	150.17	METHADONE	8	128.35	METHADONE	7	135.86	METHADONE	6	157.15
MORPHINE	15	170.74	MORPHINE	17	181.14	MORPHINE	24	231.48	MORPHINE	22	148.98	MORPHINE	23	156	MORPHINE	23	176.49	MORPHINE	19	187.62	MORPHINE	29	139.63	MORPHINE	165.71	7.2	MORPHINE	26	144.68	MORPHINE	23	149.12	MORPHINE	18	133.82	MORPHINE	14	212.5	MORPHINE	18	133
THEBAINE	1	100	THEBAINE			THEBAINE			THEBAINE			THEBAINE			THEBAINE			THEBAINE			THEBAINE			THEBAINE			THEBAINE			THEBAINE			THEBAINE			THEBAINE			THEBAINE
NALOXONE	1	0.48	NALOXONE			NALOXONE			NALOXONE			NALOXONE			NALOXONE			NALOXONE			NALOXONE			NALOXONE			NALOXONE			NALOXONE			NALOXONE			NALOXONE			NALOXONE
OXYMORPHONE	1	0.17	OXYMORPHONE	2	0.75	OXYMORPHONE	2	0.89	OXYMORPHONE	3	1.98	OXYMORPHONE	5	1.84	OXYMORPHONE	5	2.03	OXYMORPHONE	5	2.36	OXYMORPHONE	4	3.01	OXYMORPHONE	2.32	0.58	OXYMORPHONE	5	1.86	OXYMORPHONE	3	1.86	OXYMORPHONE	3	0.54	OXYMORPHONE			OXYMORPHONE
ALFENTANIL			ALFENTANIL			ALFENTANIL			ALFENTANIL			ALFENTANIL	1	0.01	ALFENTANIL			ALFENTANIL			ALFENTANIL	1	0.04	ALFENTANIL	0.01	0.01	ALFENTANIL	1	0.01	ALFENTANIL			ALFENTANIL			ALFENTANIL			ALFENTANIL
REMIFENTANIL			REMIFENTANIL	3	0.09	REMIFENTANIL	6	0.38	REMIFENTANIL	3	0.27	REMIFENTANIL	5	0.17	REMIFENTANIL	6	0.2	REMIFENTANIL	8	0.26	REMIFENTANIL	4	0.24	REMIFENTANIL	0.23	0.05	REMIFENTANIL	6	0.32	REMIFENTANIL	6	0.23	REMIFENTANIL	5	0.25	REMIFENTANIL			REMIFENTANIL
SUFENTANIL BASE			SUFENTANIL BASE			SUFENTANIL BASE	1	0	SUFENTANIL BASE	1	0.05	SUFENTANIL BASE	1	0.1	SUFENTANIL BASE			SUFENTANIL BASE			SUFENTANIL BASE			SUFENTANIL BASE	0.03	0.03	SUFENTANIL BASE			SUFENTANIL BASE	1	0	SUFENTANIL BASE	1	0.02	SUFENTANIL BASE			SUFENTANIL BASE
			TAPENTADOL			TAPENTADOL			TAPENTADOL			TAPENTADOL	1	20	TAPENTADOL	1	35	TAPENTADOL	1	30	TAPENTADOL	1	13	TAPENTADOL			TAPENTADOL			TAPENTADOL			TAPENTADOL			TAPENTADOL			TAPENTADOL
FENTANYL BASE			FENTANYL BASE	18	19.61	FENTANYL BASE	23	18.23	FENTANYL BASE	21	14.89	FENTANYL BASE	25	24.6	FENTANYL BASE	25	19.34	FENTANYL BASE	27	16.39	FENTANYL BASE	24	27.75	FENTANYL BASE	17.85	0.64	FENTANYL BASE	29	18.88	FENTANYL BASE	27	16.36	FENTANYL BASE	26	15.81	FENTANYL BASE	23	13.17	FENTANYL BASE	25	14.01
14-HYDROXYCODEINONE	1	0.04	14-HYDROXYCODEINONE			14-HYDROXYCODEINONE			14-HYDROXYCODEINONE			14-HYDROXYCODEINONE			14-HYDROXYCODEINONE			14-HYDROXYCODEINONE			14-HYDROXYCODEINONE			14-HYDROXYCODEINONE			14-HYDROXYCODEINONE			14-HYDROXYCODEINONE			14-HYDROXYCODEINONE			14-HYDROXYCODEINONE			14-HYDROXYCODEINONE

## Sheet: MME
Grams
CODEINE	BUPRENORPHINE	OXYCODONE	HYDROMORPHONE	HYDROCODONE	MEPERIDINE (PETHIDINE)	METHADONE	MORPHINE	OXYMORPHONE	Tapentadol	FENTANYL BASE	year
427.15	7.16	233.81	42.09	391.22	57.01	8.84	170.74	0.17		15.43	6
84.61	6.16	8.62	52.37	141.47	34.34	85.18	181.14	0.75		19.61	7
182.14	11.22	88.75	48.88	343.91	45.54	31.39	231.48	0.89		18.23	8
148.08	11.13	9.41	37.62	309.9	53.16	56.7	148.98	1.98		14.89	9
237.84	9.04	12.55	39.23	545.35	17.87	72.89	156	1.84	20	24.6	10
333.07	10.1	8.25	43.98	164.16	26.15	100.71	176.49	2.03	35	19.34	11
279.98	20.01	4.48	56.84	111.36	35.95	113.23	187.62	2.36	30	16.39	12
219.21	16.06	2.69	51.58	98.15	19.61	106.43	139.63	3.01	13	27.75	13
323.17	10.61		46.34	91.7	9.8	150.89	165.71	2.32		17.85	14
552.72	7.54		41.15	106.61	21.79	140.33	144.68	1.86		18.88	15
1343.24	6.68	1.34	47.39	92.98	15.25	150.17	149.12	1.86		16.36	16
2220.08	8	0.45	50.89	123.82	3.81	128.35	133.82	0.54		15.81	17
2144.83	7.9	0.45	30.45	116.31	7.63	135.86	212.5			13.17	18
1263.26	7.11	0.45	37.02	118.73	10.89	157.15	133			14.01	19
Conversion											year
0.15	10	1.5	4	1	0.1	8	1	3	0.4	75	6
0.15	10	1.5	4	1	0.1	8	1	3	0.4	75	7
0.15	10	1.5	4	1	0.1	8	1	3	0.4	75	8
0.15	10	1.5	4	1	0.1	8	1	3	0.4	75	9
0.15	10	1.5	4	1	0.1	8	1	3	0.4	75	10
0.15	10	1.5	4	1	0.1	8	1	3	0.4	75	11
0.15	10	1.5	4	1	0.1	8	1	3	0.4	75	12
0.15	10	1.5	4	1	0.1	8	1	3	0.4	75	13
0.15	10	1.5	4	1	0.1	8	1	3	0.4	75	14
0.15	10	1.5	4	1	0.1	8	1	3	0.4	75	15
0.15	10	1.5	4	1	0.1	8	1	3	0.4	75	16
0.15	10	1.5	4	1	0.1	8	1	3	0.4	75	17
0.15	10	1.5	4	1	0.1	8	1	3	0.4	75	18
0.15	10	1.5	4	1	0.1	8	1	3	0.4	75	19
MME											year	total
64.0725	71.6	350.715	168.36	391.22	5.701	70.72	170.74	0.51	0	1157.25	6	2450.89
12.6915	61.6	12.93	209.48	141.47	3.434	681.44	181.14	2.25	0	1470.75	7	2777.19
27.321	112.2	133.125	195.52	343.91	4.554	251.12	231.48	2.67	0	1367.25	8	2669.15
22.212	111.3	14.115	150.48	309.9	5.316	453.6	148.98	5.94	0	1116.75	9	2338.59
35.676	90.4	18.825	156.92	545.35	1.787	583.12	156	5.52	8	1845	10	3446.6
49.9605	101	12.375	175.92	164.16	2.615	805.68	176.49	6.09	14	1450.5	11	2958.79
41.997	200.1	6.72	227.36	111.36	3.595	905.84	187.62	7.08	12	1229.25	12	2932.92
32.8815	160.6	4.035	206.32	98.15	1.961	851.44	139.63	9.03	5.2	2081.25	13	3590.5
48.4755	106.1	0	185.36	91.7	0.98	1207.12	165.71	6.96	0	1338.75	14	3151.16		14to19	0.0574527
82.908	75.4	0	164.6	106.61	2.179	1122.64	144.68	5.58	0	1416	15	3120.6
201.486	66.8	2.01	189.56	92.98	1.525	1201.36	149.12	5.58	0	1227	16	3137.42
333.012	80	0.675	203.56	123.82	0.381	1026.8	133.82	1.62	0	1185.75	17	3089.44
321.724	79	0.675	121.8	116.31	0.763	1086.88	212.5	0	0	987.75	18	2927.4
189.489	71.1	0.675	148.08	118.73	1.089	1257.2	133	0	0	1050.75	19	2970.11	0.172785
2970.11	2970.11	2970.11	2970.11	2970.11	2970.11	2970.11	2970.11	2970.11	2970.11	2970.11	2970.11	total
6.37986	2.39385	0.0227264	4.98567	3.99749	0.0366653	42.3284	4.47794	0	0	35.3774		percent
CODEINE	BUPRENORPHINE	OXYCODONE	HYDROMORPHONE	HYDROCODONE	MEPERIDINE (PETHIDINE)	METHADONE	MORPHINE	OXYMORPHONE	Tapentadol	FENTANYL BASE
42.3284	methadone (42.3%)	77.7058
35.3774	fentanyl (35.4%)
6.37986	codeine (6.4%)
4.98567	hydromorphone (5.0%)
4.47794	morphine (4.5%)
3.99749	hydrocodone (4.0%)
2.39385	buprenorphine (2.4%)
0.0366653	meperidine (0.04%)
0.0227264	oxymorphone (0.02%)
100
0.0593917	other (0.06%)

## Sheet: Regional_2019
State	methadone_2019_Registrants	methadone_2019_grams	pentobarbital_2017_recipients	pent_17_grams			State	pent_17_grams		Percent	total
Alabama	0	0	0	0		1	Michigan	13329.2	48702.7	27.3686	96.8866
Alaska	0	0	0	0		2	Illinois	10397.7	48702.7	21.3494
American Samoa	0	0	0	0		3	Missouri	8886.15	48702.7	18.2457
Arizona	0	0	0	0		4	Virgin Islands	7997.54	48702.7	16.4211
Arkansas	0	0	0	0		5	Pennsylvania	3732.18	48702.7	7.66319
California	0	0	2	622.03		6	Texas	2843.57	48702.7	5.83863
Colorado	0	0	0	0		7	California	622.03	48702.7	1.2772
Connecticut	0	0	0	0		8	North Carolina	266.58	48702.7	0.547362
Deleware	0	0	0	0		9	New York	182.28	48702.7	0.374271
DC	0	0	0	0		10	North Dakota	177.72	48702.7	0.364908
Florida	0	0	0	0		11	Kentucky	88.86	48702.7	0.182454
Georgia	0	0	0	0		12	Oklahoma	88.86	48702.7	0.182454
Guam	0	0	0	0		13	South Dakota	88.86	48702.7	0.182454
Hawaii	0	0	0	0		14	Ohio	0.91	48702.7	0.00186848
Idaho	0	0	0	0		15	Puerto Rico	0.2	48702.7	0.000410655
Illinois	1	12.88	3	10397.7				48702.7
Indiana	0	0	0	0
Iowa	0	0	0	0
Kansas	0	0	0	0
Kentucky	0	0	1	88.86
Louisiana	0	0	0	0
Maine	0	0	0	0
Maryland	0	0	0	0
Massachusetts			0	0
Michigan	1	44.36	1	13329.2
Minnesota			0	0
Mississippi	0	0	0	0
Missouri	0	0	1	8886.15
Montana			0	0
Nebraska	0	0	0	0
Nevada	0	0	0	0
New Hampshire			0	0
New Jersey	0	0	0	0
New York	0	0	2	182.28
North Carolina	0	0	1	266.58
North Dakota			1	177.72
New Mexico	0	0	0	0
Ohio	0	0	1	0.91
Oklahoma	1	39.8	1	88.86
Oregon	0	0	0	0
Pennsylvania	1	32.38	1	3732.18
Puerto Rico	0	0	1	0.2
Rhode Island	0	0	0	0
South Carolina	0	0	0	0
South Dakota	0	0	1	88.86
Tennessee	0	0	0	0
Texas	1	22.72	2	2843.57
Utah	0	0	0	0
Vermont	0	0	0	0
Virgin Islands	0	0	1	7997.54
Virginia	1	5.01	0	0
Washington	0	0	0	0
West Virginia	0	0	0	0
Wisconsin	0	0	0	0
Wyoming	0	0	0	0
total (report 5)	6	157.15	20	48702.7
total (report 7 )	6	157.15	20	48702.7
		0
Michigan	1	44.36	157.15	28.2278
Oklahoma	1	39.8	157.15	25.3261
Pennsylvania	1	32.38	157.15	20.6045
Texas	1	22.72	157.15	14.4575
Illinois	1	12.88	157.15	8.19599
Virginia	1	5.01	157.15	3.18804
		157.15

## Sheet: Buyers_2011
	2011
Ala	2
Alaska	0
Ark	1
Ca	1
CO	2
FL	1
GA	1
HI	1
ID	2
IL	3
IO	1
KS	1
KT	1
LA	1
ME	1
MD	1
MA	1
MI	2
MN	11
MS	1
Missouri	4
Mont	2
NE	1
NJ	3
NM	1
NY	6
NC	2
ND	1
OH	5
OK	1
OR	1
PA	2
SC	1
SD	3
TN	1
TX	4
UT	3
VT	1
VI	2
WA	1
WV	1
WI	8
WY	1
total	90

## Sheet: Horizontal
Name_06	Buyers_06	Grams_06	Name_07	Buyer_07	Grams_07	Name_08	Buyers_08	Grams_08	Name_09	Buyers_09	Grams_09	Name_10	Buyers_10	Grams_10	Name_11	Buyers_11	Grams_11	Name_12$	Buyers_12	Grams_12	Name_13$	Buyers_13	Grams_13	Names_14$	Buyers_14	Grams_14	Names_15$	Buyers_15	Grams_15	Name_16$	Buyers_16	Grams_16	Name_17$	Buyers_17	Grams_17	Name_18$	Buyers_18	Grams_18	Name_19$	Buyers_19	Grams_19
AMPHETAMINE	10	2134.04	AMPHETAMINE	3	251.03	AMPHETAMINE	4	730.51	AMPHETAMINE	6	262.5	AMPHETAMINE	5	288.64	AMPHETAMINE	2	268.12	AMPHETAMINE	3	218.13	AMPHETAMINE	7	121.33	AMPHETAMINE	9.54	1.91	AMPHETAMINE	4	8.81	AMPHETAMINE	1	0.73	AMPHETAMINE	2	2.2	AMPHETAMINE	1	0.73	AMPHETAMINE	1	1.25
D-METHAMPHETAMINE	4	16.04	D-METHAMPHETAMINE	1	4.01	D-METHAMPHETAMINE	3	5.42	D-METHAMPHETAMINE	3	8.11	D-METHAMPHETAMINE	6	40.49	D-METHAMPHETAMINE	5	5.42	D-METHAMPHETAMINE	1	0.08	D-METHAMPHETAMINE	4	16.15	D-METHAMPHETAMINE	4.1	2.05	D-METHAMPHETAMINE	1	4.02	D-METHAMPHETAMINE	3	4.18	D-METHAMPHETAMINE	2	8.03	D-METHAMPHETAMINE			D-METHAMPHETAMINE
LISDEXAMFETAMINE			LISDEXAMFETAMINE	1	5.78	LISDEXAMFETAMINE	2	90.18	LISDEXAMFETAMINE	1	46.83	LISDEXAMFETAMINE	1	115.62	LISDEXAMFETAMINE	1	125.45	LISDEXAMFETAMINE	1	127.18	LISDEXAMFETAMINE	1	60.12	LISDEXAMFETAMINE			LISDEXAMFETAMINE			LISDEXAMFETAMINE			LISDEXAMFETAMINE			LISDEXAMFETAMINE			LISDEXAMFETAMINE
MEPHEDRONE; 4-METHOXYMETHCATHINONE;METHEDRONE			MEPHEDRONE; 4-METHOXYMETHCATHINONE;METHEDRONE			MEPHEDRONE; 4-METHOXYMETHCATHINONE;METHEDRONE			MEPHEDRONE; 4-METHOXYMETHCATHINONE;METHEDRONE			MEPHEDRONE; 4-METHOXYMETHCATHINONE;METHEDRONE			MEPHEDRONE; 4-METHOXYMETHCATHINONE;METHEDRONE			MEPHEDRONE; 4-METHOXYMETHCATHINONE;METHEDRONE	1	0.02	MEPHEDRONE; 4-METHOXYMETHCATHINONE;METHEDRONE			MEPHEDRONE; 4-METHOXYMETHCATHINONE;METHEDRONE			MEPHEDRONE; 4-METHOXYMETHCATHINONE;METHEDRONE			MEPHEDRONE; 4-METHOXYMETHCATHINONE;METHEDRONE			MEPHEDRONE; 4-METHOXYMETHCATHINONE;METHEDRONE			MEPHEDRONE; 4-METHOXYMETHCATHINONE;METHEDRONE			MEPHEDRONE; 4-METHOXYMETHCATHINONE;METHEDRONE
METHYLPHENIDATE	5	789.51	METHYLPHENIDATE	2	93.58	METHYLPHENIDATE	4	420.84	METHYLPHENIDATE	3	131.35	METHYLPHENIDATE	4	146.39	METHYLPHENIDATE (DL;D;L;ISOMERS)	1	185.56	METHYLPHENIDATE	3	188.59	METHYLPHENIDATE (DL;D;L;ISOMERS)	3	98.84	METHYLPHENIDATE (DL;D;L;ISOMERS)	3.86	0.77	METHYLPHENIDATE (DL;D;L;ISOMERS)	3	3.46	METHYLPHENIDATE (DL;D;L;ISOMERS)	5	18.33	METHYLPHENIDATE (DL;D;L;ISOMERS)	1	0.43	METHYLPHENIDATE (DL;D;L;ISOMERS)			METHYLPHENIDATE (DL;D;L;ISOMERS)	2	2.68
GAMMA HYDROXYBUTYRIC ACID			GAMMA HYDROXYBUTYRIC ACID			GAMMA HYDROXYBUTYRIC ACID	1	8.26	GAMMA HYDROXYBUTYRIC ACID			GAMMA HYDROXYBUTYRIC ACID			GAMMA HYDROXYBUTYRIC ACID			GAMMA HYDROXYBUTYRIC ACID			GAMMA HYDROXYBUTYRIC ACID			GAMMA HYDROXYBUTYRIC ACID			GAMMA HYDROXYBUTYRIC ACID			GAMMA HYDROXYBUTYRIC ACID			GAMMA HYDROXYBUTYRIC ACID			GAMMA HYDROXYBUTYRIC ACID			GAMMA HYDROXYBUTYRIC ACID
AMOBARBITAL (SCHEDULE 2)	1	0.09	AMOBARBITAL (SCHEDULE 2)	1	0.18	AMOBARBITAL (SCHEDULE 2)			AMOBARBITAL (SCHEDULE 2)			AMOBARBITAL (SCHEDULE 2)			AMOBARBITAL (SCHEDULE 2)			AMOBARBITAL (SCHEDULE 2)			AMOBARBITAL (SCHEDULE 2)			AMOBARBITAL (SCHEDULE 2)			AMOBARBITAL (SCHEDULE 2)			AMOBARBITAL (SCHEDULE 2)			AMOBARBITAL (SCHEDULE 2)			AMOBARBITAL (SCHEDULE 2)			AMOBARBITAL (SCHEDULE 2)
BUTALBITAL	2	30	BUTALBITAL	1	5	BUTALBITAL	1	35	BUTALBITAL			BUTALBITAL			BUTALBITAL			BUTALBITAL			BUTALBITAL			BUTALBITAL			BUTALBITAL			BUTALBITAL			BUTALBITAL			BUTALBITAL			BUTALBITAL
PENTOBARBITAL (SCHEDULE 2)	34	18884.3	PENTOBARBITAL (SCHEDULE 2)	44	35079.1	PENTOBARBITAL (SCHEDULE 2)	43	37791.5	PENTOBARBITAL (SCHEDULE 2)	34	39640.4	PENTOBARBITAL (SCHEDULE 2)	31	69350.4	PENTOBARBITAL (SCHEDULE 2)	21	41856.5	PENTOBARBITAL (SCHEDULE 2)	28	36380.3	PENTOBARBITAL (SCHEDULE 2)	28	51386.6	PENTOBARBITAL (SCHEDULE 2)	48725.3	2030.22	PENTOBARBITAL (SCHEDULE 2)	19	55372.1	PENTOBARBITAL (SCHEDULE 2)	17	42051.1	PENTOBARBITAL (SCHEDULE 2)	20	48702.7	PENTOBARBITAL (SCHEDULE 2)			PENTOBARBITAL (SCHEDULE 2)
5-METHOXY-N,N-DIISOPROPYLTRYPTAMINE(5-MEO-DIPT)			5-METHOXY-N,N-DIISOPROPYLTRYPTAMINE(5-MEO-DIPT)			5-METHOXY-N,N-DIISOPROPYLTRYPTAMINE(5-MEO-DIPT)			5-METHOXY-N,N-DIISOPROPYLTRYPTAMINE(5-MEO-DIPT)			5-METHOXY-N,N-DIISOPROPYLTRYPTAMINE(5-MEO-DIPT)			5-METHOXY-N,N-DIISOPROPYLTRYPTAMINE(5-MEO-DIPT)			5-METHOXY-N,N-DIISOPROPYLTRYPTAMINE(5-MEO-DIPT)	1	0.01	5-METHOXY-N,N-DIISOPROPYLTRYPTAMINE(5-MEO-DIPT)			5-METHOXY-N,N-DIISOPROPYLTRYPTAMINE(5-MEO-DIPT)			5-METHOXY-N,N-DIISOPROPYLTRYPTAMINE(5-MEO-DIPT)			5-METHOXY-N,N-DIISOPROPYLTRYPTAMINE(5-MEO-DIPT)			5-METHOXY-N,N-DIISOPROPYLTRYPTAMINE(5-MEO-DIPT)			5-METHOXY-N,N-DIISOPROPYLTRYPTAMINE(5-MEO-DIPT)			5-METHOXY-N,N-DIISOPROPYLTRYPTAMINE(5-MEO-DIPT)
PHENCYCLIDINE (PCP)			PHENCYCLIDINE (PCP)	2	2.46	PHENCYCLIDINE (PCP)	2	1.17	PHENCYCLIDINE (PCP)	3	0.91	PHENCYCLIDINE (PCP)	2	0.91	PHENCYCLIDINE (PCP)	1	0.22	PHENCYCLIDINE (PCP)	2	0.04	PHENCYCLIDINE (PCP)	2	0.87	PHENCYCLIDINE (PCP)			PHENCYCLIDINE (PCP)	1	0.22	PHENCYCLIDINE (PCP)			PHENCYCLIDINE (PCP)			PHENCYCLIDINE (PCP)			PHENCYCLIDINE (PCP)
COCAINE	4	15.16	COCAINE	4	7.13	COCAINE	2	1.79	COCAINE	5	15.18	COCAINE	5	14.39	COCAINE	1	0.89	COCAINE	4	11.61	COCAINE	5	12.18	COCAINE	16.36	3.27	COCAINE	2	1.46	COCAINE	2	1.18	COCAINE	3	3.11	COCAINE			COCAINE
CODEINE	8	427.15	CODEINE	6	84.61	CODEINE	7	182.14	CODEINE	5	148.08	CODEINE	9	237.84	CODEINE	7	333.07	CODEINE	9	279.98	CODEINE	9	219.21	CODEINE	323.17	53.86	CODEINE	5	552.72	CODEINE	6	1343.24	CODEINE	5	2220.08	CODEINE	5	2144.83	CODEINE	5	1263.26
BUPRENORPHINE	15	7.16	BUPRENORPHINE	16	6.16	BUPRENORPHINE	63	11.22	BUPRENORPHINE	74	11.13	BUPRENORPHINE	65	9.04	BUPRENORPHINE	86	10.1	BUPRENORPHINE	78	20.01	BUPRENORPHINE	84	16.06	BUPRENORPHINE	10.61	0.15	BUPRENORPHINE	77	7.54	BUPRENORPHINE	64	6.68	BUPRENORPHINE	64	8	BUPRENORPHINE	57	7.9	BUPRENORPHINE	53	7.11
DIHYDROCODEINE	1	0.32	DIHYDROCODEINE			DIHYDROCODEINE	1	1.07	DIHYDROCODEINE			DIHYDROCODEINE			DIHYDROCODEINE			DIHYDROCODEINE			DIHYDROCODEINE			DIHYDROCODEINE			DIHYDROCODEINE			DIHYDROCODEINE			DIHYDROCODEINE			DIHYDROCODEINE			DIHYDROCODEINE
OXYCODONE	4	233.81	OXYCODONE	3	8.62	OXYCODONE	3	88.75	OXYCODONE	1	9.41	OXYCODONE	2	12.55	OXYCODONE	1	8.25	OXYCODONE	2	4.48	OXYCODONE	3	2.69	OXYCODONE			OXYCODONE			OXYCODONE	1	1.34	OXYCODONE	1	0.45	OXYCODONE	1	0.45	OXYCODONE	1	0.45
HYDROMORPHONE	5	42.09	HYDROMORPHONE	9	52.37	HYDROMORPHONE	12	48.88	HYDROMORPHONE	13	37.62	HYDROMORPHONE	13	39.23	HYDROMORPHONE	16	43.98	HYDROMORPHONE	19	56.84	HYDROMORPHONE	22	51.58	HYDROMORPHONE	46.34	2.01	HYDROMORPHONE	25	41.15	HYDROMORPHONE	28	47.39	HYDROMORPHONE	24	50.89	HYDROMORPHONE	20	30.45	HYDROMORPHONE	25	37.02
HYDROCODONE	10	391.22	HYDROCODONE	9	141.47	HYDROCODONE	13	343.91	HYDROCODONE	14	309.9	HYDROCODONE	15	545.35	HYDROCODONE	17	164.16	HYDROCODONE	15	111.36	HYDROCODONE	12	98.15	HYDROCODONE	91.7	9.17	HYDROCODONE	9	106.61	HYDROCODONE	7	92.98	HYDROCODONE	8	123.82	HYDROCODONE	10	116.31	HYDROCODONE	8	118.73
MEPERIDINE (PETHIDINE)	6	57.01	MEPERIDINE (PETHIDINE)	10	34.34	MEPERIDINE (PETHIDINE)	10	45.54	MEPERIDINE (PETHIDINE)	10	53.16	MEPERIDINE (PETHIDINE)	6	17.87	MEPERIDINE (PETHIDINE)	7	26.15	MEPERIDINE (PETHIDINE)	7	35.95	MEPERIDINE (PETHIDINE)	4	19.61	MEPERIDINE (PETHIDINE)	9.8	2.45	MEPERIDINE (PETHIDINE)	8	21.79	MEPERIDINE (PETHIDINE)	3	15.25	MEPERIDINE (PETHIDINE)	3	3.81	MEPERIDINE (PETHIDINE)	3	7.63	MEPERIDINE (PETHIDINE)	3	10.89
METHADONE	4	8.84	METHADONE	4	85.18	METHADONE	3	31.39	METHADONE	2	56.7	METHADONE	5	72.89	METHADONE	4	100.71	METHADONE	4	113.23	METHADONE	5	106.43	METHADONE	150.89	21.56	METHADONE	8	140.33	METHADONE	6	150.17	METHADONE	8	128.35	METHADONE	7	135.86	METHADONE	6	157.15
MORPHINE	15	170.74	MORPHINE	17	181.14	MORPHINE	24	231.48	MORPHINE	22	148.98	MORPHINE	23	156	MORPHINE	23	176.49	MORPHINE	19	187.62	MORPHINE	29	139.63	MORPHINE	165.71	7.2	MORPHINE	26	144.68	MORPHINE	23	149.12	MORPHINE	18	133.82	MORPHINE	14	212.5	MORPHINE	18	133
THEBAINE	1	100	THEBAINE			THEBAINE			THEBAINE			THEBAINE			THEBAINE			THEBAINE			THEBAINE			THEBAINE			THEBAINE			THEBAINE			THEBAINE			THEBAINE			THEBAINE
NALOXONE	1	0.48	NALOXONE			NALOXONE			NALOXONE			NALOXONE			NALOXONE			NALOXONE			NALOXONE			NALOXONE			NALOXONE			NALOXONE			NALOXONE			NALOXONE			NALOXONE
OXYMORPHONE	1	0.17	OXYMORPHONE	2	0.75	OXYMORPHONE	2	0.89	OXYMORPHONE	3	1.98	OXYMORPHONE	5	1.84	OXYMORPHONE	5	2.03	OXYMORPHONE	5	2.36	OXYMORPHONE	4	3.01	OXYMORPHONE	2.32	0.58	OXYMORPHONE	5	1.86	OXYMORPHONE	3	1.86	OXYMORPHONE	3	0.54	OXYMORPHONE			OXYMORPHONE
ALFENTANIL			ALFENTANIL			ALFENTANIL			ALFENTANIL			ALFENTANIL	1	0.01	ALFENTANIL			ALFENTANIL			ALFENTANIL	1	0.04	ALFENTANIL	0.01	0.01	ALFENTANIL	1	0.01	ALFENTANIL			ALFENTANIL			ALFENTANIL			ALFENTANIL
REMIFENTANIL			REMIFENTANIL	3	0.09	REMIFENTANIL	6	0.38	REMIFENTANIL	3	0.27	REMIFENTANIL	5	0.17	REMIFENTANIL	6	0.2	REMIFENTANIL	8	0.26	REMIFENTANIL	4	0.24	REMIFENTANIL	0.23	0.05	REMIFENTANIL	6	0.32	REMIFENTANIL	6	0.23	REMIFENTANIL	5	0.25	REMIFENTANIL			REMIFENTANIL
SUFENTANIL BASE			SUFENTANIL BASE			SUFENTANIL BASE	1	0	SUFENTANIL BASE	1	0.05	SUFENTANIL BASE	1	0.1	SUFENTANIL BASE			SUFENTANIL BASE			SUFENTANIL BASE			SUFENTANIL BASE	0.03	0.03	SUFENTANIL BASE			SUFENTANIL BASE	1	0	SUFENTANIL BASE	1	0.02	SUFENTANIL BASE			SUFENTANIL BASE
			TAPENTADOL			TAPENTADOL			TAPENTADOL			TAPENTADOL	1	20	TAPENTADOL	1	35	TAPENTADOL	1	30	TAPENTADOL	1	13	TAPENTADOL			TAPENTADOL			TAPENTADOL			TAPENTADOL			TAPENTADOL			TAPENTADOL
FENTANYL BASE			FENTANYL BASE	18	19.61	FENTANYL BASE	23	18.23	FENTANYL BASE	21	14.89	FENTANYL BASE	25	24.6	FENTANYL BASE	25	19.34	FENTANYL BASE	27	16.39	FENTANYL BASE	24	27.75	FENTANYL BASE	17.85	0.64	FENTANYL BASE	29	18.88	FENTANYL BASE	27	16.36	FENTANYL BASE	26	15.81	FENTANYL BASE	23	13.17	FENTANYL BASE	25	14.01
14-HYDROXYCODEINONE	1	0.04	14-HYDROXYCODEINONE			14-HYDROXYCODEINONE			14-HYDROXYCODEINONE			14-HYDROXYCODEINONE			14-HYDROXYCODEINONE			14-HYDROXYCODEINONE			14-HYDROXYCODEINONE			14-HYDROXYCODEINONE			14-HYDROXYCODEINONE			14-HYDROXYCODEINONE			14-HYDROXYCODEINONE			14-HYDROXYCODEINONE			14-HYDROXYCODEINONE

## Sheet: PDMP_Policies
State	Query	Comment	Link
Alabama	no	Veterinarians cannot access PDMP data but can voluntarily report to the PDMP.	https://www.pdmpassist.org/pdf/state_summaries/Alabama_Summary_Profile_20191126.pdf
Alaska	yes	Veterinarians are required by statute/rule/policy to query	https://www.pdmpassist.org/pdf/state_summaries/Alaska_Summary_Profile_20190919.pdf
Arizona	no	Veterinarians are not permitted by statute/rule/policy to query	https://www.pdmpassist.org/pdf/state_summaries/Arizona_Summary_Profile_20191118.pdf
Arkansas	yes	Veterinarians are required by statute/rule/policy to query	https://www.pdmpassist.org/pdf/state_summaries/Arkansas_Summary_Profile_20191118.pdf
California	yes	Veterinarians are required to enroll as data requesters with the PDMP	https://www.pdmpassist.org/pdf/state_summaries/California_Summary_Profile_20190815.pdf
Colorado	yes	Veterinarians are required to enroll as data requesters with the PDMP	https://www.pdmpassist.org/pdf/state_summaries/Colorado_Summary_Profile_20191118.pdf
Connecticut	yes	Veterinarians are required to enroll as data requesters with the PDMP, if they are dispensing controlled substances	https://www.pdmpassist.org/pdf/state_summaries/Connecticut_Summary_Profile_20190815.pdf
Deleware	no	Veterinarians are not permitted by statute/rule/policy to query	https://www.pdmpassist.org/pdf/state_summaries/Delaware_Summary_Profile_20190815.pdf
DC	yes	Veterinarians can voluntarily enroll as data requesters with the PDMP	https://www.pdmpassist.org/pdf/state_summaries/District_of_Columbia_Summary_Profile_20191126.pdf
Florida	no	Veterinarian access is not authorized.	https://www.pdmpassist.org/pdf/state_summaries/Florida_Summary_Profile_20191126.pdf
Georgia	no	Veterinarians are not permitted by statute/rule/policy to query	https://www.pdmpassist.org/pdf/state_summaries/Georgia_Summary_Profile_20191126.pdf
Guam	no	Veterinarians are exempted from enrollment as data requesters	https://www.pdmpassist.org/pdf/state_summaries/Guam_Summary_Profile_20190815.pdf
Hawaii	yes	Veterinarians can voluntarily query and do query	https://www.pdmpassist.org/pdf/state_summaries/Hawaii_Summary_Profile_20190815.pdf
Idaho	yes?	Veterinarians can voluntarily enroll as data requesters with the PDMP and do enroll as data requestors	https://www.pdmpassist.org/pdf/state_summaries/Idaho_Summary_Profile_20190828.pdf
Illinois	yes	Veterinarians are required to enroll as data requesters with the PDMP	https://www.pdmpassist.org/pdf/state_summaries/Illinois_Summary_Profile_20191118.pdf
Indiana	yes	Animal's Name or Animal's First Name and Animal Owner's Last Name	https://www.pdmpassist.org/pdf/state_summaries/Indiana_Summary_Profile_20190815.pdf
Iowa	yes	Veterinarians can voluntarily enroll as data requesters with the PDMP	https://www.pdmpassist.org/pdf/state_summaries/Iowa_Summary_Profile_20190828.pdf
Kansas	no	Veterinarians are not permitted by statute/rule/policy to query	https://www.pdmpassist.org/pdf/state_summaries/Kansas_Summary_Profile_20190815.pdf
Kentucky	yes	Veterinarians can voluntarily query and do query	https://www.pdmpassist.org/pdf/state_summaries/Kentucky_Summary_profile_20200624.pdf
Louisiana	no	Veterinarians are not permitted by statute/rule/policy to query	https://www.pdmpassist.org/pdf/state_summaries/Louisiana_Summary_Profile_20190815.pdf
Maine	yes	Veterinarians are required by statute/rule/policy to query	https://www.pdmpassist.org/pdf/state_summaries/Maine_Summary_Profile_20190815.pdf
Maryland	no	Veterinarians are not permitted by statute/rule/policy to query	https://www.pdmpassist.org/pdf/state_summaries/Maryland_Summary_Profile_20191203.pdf
Massachusetts	no	Veterinarian usage of PMP is an ongoing discussion concerning access and data submission consistency	https://www.pdmpassist.org/pdf/state_summaries/Massachusetts_Summary_Profile_20190827.pdf
Michigan	yes	Required to query the PDMP if prescribing in excess of a 3-days supply, except if a pharmacist will be dispensing the prescription.	https://www.pdmpassist.org/pdf/state_summaries/Michigan_Summary_Profile_20190815.pdf
Minnesota	yes (future)	We are moving towards a model where pharmacies report to the PMP using the owner's first and last name and DOB. Upon querying, the veterinarian will only see animal data. However, prescribers for humans will see all data (both animal and human), as will pharmacists.	https://www.pdmpassist.org/pdf/state_summaries/Minnesota_Summary_Profile_20191112.pdf
Mississippi	yes	Veterinarians can voluntarily query, but do not query	https://www.pdmpassist.org/pdf/state_summaries/Mississippi_Summary_Profile_20190815.pdf
Missouri	no	Veterinarians are not permitted by statute/rule/policy to query	https://www.pdmpassist.org/pdf/state_summaries/Missouri_Summary_Profile_20190815.pdf
Montana	no	Veterinarians are not permitted by statute/rule/policy to query	https://www.pdmpassist.org/pdf/state_summaries/Montana_Summary_Profile_20191031.pdf
Nebraska	no	Veterinarians are not allowed to view PDMP data but are required to submit dispensed data.	https://www.pdmpassist.org/pdf/state_summaries/Nebraska_Summary_Profile_20191220.pdf
Nevada	no	Veterinarians are not permitted by statute/rule/policy to query	https://www.pdmpassist.org/pdf/state_summaries/Nevada_Summary_Profile_20190815.pdf
New Hampshire	yes	Veterinarian access to owner's prescription history	https://www.pdmpassist.org/pdf/state_summaries/New_Hampshire_Summary_Profile_20191126.pdf
New Jersey	yes	Veterinarians can voluntarily query and do query	https://www.pdmpassist.org/pdf/state_summaries/New_Jersey_Summary_Profile_20191118.pdf
New Mexico	yes	Veterinarians can request access to the NM PMP and can voluntarily query the database	https://www.pdmpassist.org/pdf/state_summaries/New_Mexico_Summary_Profile_20190815.pdf
New York	no	Veterinarians are not permitted by statute/rule/policy to query	https://www.pdmpassist.org/pdf/state_summaries/New_York_Summary_Profile_20190815.pdf
North Carolina	yes	If registered they can query.	https://www.pdmpassist.org/pdf/state_summaries/North_Carolina_Summary_Profile_20190815.pdf
North Dakota	no	Veterinarians do not currently have access to the ND PDMP	https://www.pdmpassist.org/pdf/state_summaries/North_Dakota_Summary_Profile_20190815.pdf
Ohio	yes	Veterinarians can voluntarily query and do query	https://www.pdmpassist.org/pdf/state_summaries/Ohio_Summary_Profile_20190815.pdf
Oklahoma	yes	Veterinarians are required by statute/rule/policy to query	https://www.pdmpassist.org/pdf/state_summaries/Oklahoma_Summary_Profile_20191118.pdf
Oregon	no	Veterinarians are not permitted by statute/rule/policy to query	https://www.pdmpassist.org/pdf/state_summaries/Oregon_Summary_Profile_20190815.pdf
Pennsylvania	no	Veterinarians are not permitted by statute/rule/policy to query	https://www.pdmpassist.org/pdf/state_summaries/Pennsylvania_Summary_Profile_20191126.pdf
Puerto Rico	no	Veterinarians are exempted from enrollment as data requesters	https://www.pdmpassist.org/pdf/state_summaries/Puerto_Rico_Summary_Profile_20190919.pdf
Rhode Island	yes	Veterinarian access to owner's prescription history	https://www.pdmpassist.org/pdf/state_summaries/Rhode_Island_Summary_Profile_20200406.pdf
South Carolina	yes	Veterinarians are required by statute/rule/policy to query	https://www.pdmpassist.org/pdf/state_summaries/South_Carolina_Summary_Profile_20190815.pdf
South Dakota	no	Veterinarians are not permitted by statute/rule/policy to query	https://www.pdmpassist.org/pdf/state_summaries/South_Dakota_Summary_Profile_20191118.pdf
Tennessee	yes	Veterinarians can voluntarily query	https://www.pdmpassist.org/pdf/state_summaries/Tennessee_Summary_Profile_20190815.pdf
Texas	yes?	veterinarians may not search an owner's prescription history, can do animals	https://www.pdmpassist.org/pdf/state_summaries/Texas_Summary_Profile_20190910.pdf
Utah	yes	Veterinarians can voluntarily query, but do not query	https://www.pdmpassist.org/pdf/state_summaries/Utah_Summary_Profile_20191126.pdf
Vermont	no	Veterinarians are not allowed to enroll as either requestors or submitters	https://www.pdmpassist.org/pdf/state_summaries/Vermont_Summary_Profile_20190815.pdf
Virginia	yes?	Animal Owner's Name, Animal Owner's Address	https://www.pdmpassist.org/pdf/state_summaries/Virginia_Summary_Profile_20190815.pdf
Washington	yes	Veterinarians can voluntarily query and do query	https://www.pdmpassist.org/pdf/state_summaries/Washington_Summary_Profile_20191203.pdf
West Virginia	yes	Veterinarians are required to enroll as data requesters with the PDMP	https://www.pdmpassist.org/pdf/state_summaries/West_Virginia_Summary_Profile_20190815.pdf
Wisconsin	no	Veterinarians are not permitted by statute/rule/policy to query	https://www.pdmpassist.org/pdf/state_summaries/Wisconsin_Summary_Profile.pdf
Wyoming	yes	Veterinarians can voluntarily query and do query	https://www.pdmpassist.org/pdf/state_summaries/Wyoming_Summary_Profile_20190815.pdf

## Sheet: Sheet2
DEA Production Quotas
	2009	2020	Change 9 20 20
codeine (for sale)	39605000	30731558	22.4049		39605000	30731558
fentanyl	1428000	813005	43.0669		1428000	813005
hydrocodone (for sale)	55500000	34836854	37.2309		55500000	34836854
Methadone (for sale)	25000000	22278000	10.888		25000000	22278000
morphine (for sale)	36300000	29353655	19.1359		36300000	29353655
Pentobarbital	28000000	25850000	7.67857		28000000	25850000
oxycodone (sale)	94000000	67593983	28.0915		94000000	67593983
2009 source	https://www.deadiversion.usdoj.gov/fed_regs/quotas/2009/fr10212.htm
2020 source:	https://www.federalregister.gov/documents/2019/12/02/2019-26119/established-aggregate-production-quotas-for-schedule-i-and-ii-controlled-substances-and-assessment
2010 source:	https://www.deadiversion.usdoj.gov/fed_regs/quotas/2010/fr0914.htm
DEA Production Quotas
	2010	2020	Change 9 20 20
codeine (for sale)	39605000	30731558	22.4049
fentanyl	1428000	813005	43.0669
hydrocodone (for sale)	55000000	34836854	36.6603
Methadone (for sale)	20000000	22278000	-11.39
morphine (for sale)	39000000	29353655	24.7342
Pentobarbital	28000000	25850000	7.67857
oxycodone (sale)	105500000	67593983	35.9299

## Sheet: Sheet3
	DL-amphetamine	D-Amphetamine	methyphenidate	cocaine	codeine	buprenorphine	oxydocone	hydromorphone	hydrocodone	meperidine	methadone	mrphine	fentanyl
2000	219.9	320.85	648.8				1473.69		348
2001	299.49	431.27	539.4	16.9	777.46	0	1551.13	165.72	280.33	165.57	632.12	1495.9	33.57
2002	476.33	563.58	782.22	17.83	916.8	0.16	1901.87	302.03	327.26	152.07	847.04	2121.06	56.1
2003	595.99	687.22	737.57	27.08	513.9	0	1288.93	231.44	373	126.5	751.89	1403.18	43.63
2004	810.77	887.14	700.79	13.02	425.75	0	175.1	34.96	448.74	59.19	3.09	181.13	13.55
2005	808.25	894.56	678.52	15.81	232.93	7.91	290.29	17.74	313.73	37.44	11.51	186.62	10.55

[truncated: 1 more sheets: Pento_double_checking]
